# Supplementary material
Source: HighWire-hosted journal article supplement (https://www.cmaj.ca/highwire/filestream/59228/field_highwire_adjunct_files/0/186_11.pdf)
Supplement: 186_11.pdf [file 186_11.pdf]

## ÉDITORIAL

## Les patients et leur dossier médical : Il est temps d'opter pour la transparence

Kirsten Patrick MBBCh DA

Pour la version anglaise de l'éditorial, veuillez consulter la page 811.

Je n'ai pas directement accès à mon dossier médical, mais je pourrais demander à le consulter en vertu de la *Loi sur la protection des renseignements personnels sur la santé*<sup>1</sup> de l'Ontario. Mon médecin a l'obligation de me laisser consulter mon dossier médical, sauf dans certaines circonstances précises, et de m'y donner accès dans les 60 jours, quoique dans certaines régions, un délai de 90 jours soit « toléré » (vraiment?). Je devrais certainement devoir payer des frais pour y avoir accès. La situation est similaire dans d'autres provinces : des droits sont accordés par la loi, mais ils sont assortis d'obstacles.

Pourquoi voudrais-je consulter mon dossier médical ou demander à ce qu'il soit modifié? Après tout, il est plutôt mince (pour le moment). Je vis au Canada depuis un an seulement, et je n'ai consulté mon médecin de famille que deux fois. Eh bien, la question est précisément là. J'aimerais m'assurer que tous les renseignements pertinents figurent à mon dossier. De nombreux patients changent de ville, de province ou de pays, et se constituent un dossier fragmentaire au cours de leur vie. Les médecins ont l'obligation d'assurer que les dossiers médicaux sont exacts et complets. Bien que les médecins puissent juger que cette obligation ne s'applique qu'à leurs propres notes, un dossier médical comprenant d'importantes lacunes peut faire en sorte que le patient reçoive des soins sous-optimaux, ce qui n'est dans l'intérêt ni du patient, ni du médecin. Il existe d'autres arguments en faveur de l'accès des patients à leur dossier médical, dont le moindre n'est pas que les patients *aiment vraiment ça*.

L'accès aux dossiers médicaux par les patients a été mis à l'essai avec succès, et apparemment sans effondrement du système, en contextes de services de soins secondaires et de pratiques de soins primaires. Dans le cadre de l'une des plus importantes de ces études, menée dans trois États américains, les notes de trois pratiques de soins primaires ont été accessibles aux patients pendant un an<sup>2</sup>. Par la suite, 99 % des patients voulaient continuer à avoir accès à ces notes, et aucun médecin n'a jugé bon d'arrêter. Voilà qui est révélateur. La grande majorité des patients étudiés ont dit se sentir plus en contrôle de leurs soins et plus susceptibles d'observer leur médication lorsqu'ils avaient accès à leur dossier. Le fardeau pour les médecins semblait minimal, et aucune conséquence négative n'a été signalée.

Il y a toutefois des préoccupations importantes. La sécurité est toujours préoccupante, mais l'information permettant d'identifier les patients dans les dossiers médicaux pourrait

être protégée au même titre que les renseignements bancaires et fiscaux ou l'information sur la retraite et les assurances, à l'aide des mêmes mécanismes. Une minorité de patients sont déroutés ou choqués en lisant leur dossier médical. Voilà qui souligne la nécessité pour les médecins d'être respectueux quand ils prennent des notes et de prendre le temps d'expliquer à leurs patients le langage utilisé. Certains patients reconnaissent qu'ils partagent leur dossier médical avec une autre personne. Comme dans d'autres domaines, il faut faire comprendre aux patients ce qu'il est approprié de partager ou non.

Fait intéressant, la majorité des patients aimeraient pouvoir « approuver » ou « modifier » leur dossier médical. Les médecins s'opposent vivement à cette idée. Ils savent que l'obligation de tenir des dossiers médicaux exacts, et de ne pas les « tripoter », incombe au médecin. Il serait possible de permettre aux patients de faire des commentaires ou de modifier une adresse, mais pas de leur donner un accès absolu aux dossiers, car il est illégal de supprimer ou de falsifier une partie d'un dossier médical — des antécédents de dépression ou une interruption de grossesse, par exemple.

Aujourd'hui utilisés dans plus de 70 % des pratiques de soins primaires au Canada, les dossiers médicaux électroniques sont incontestablement préférables aux dossiers sur papier, bien qu'ils posent une foule de problèmes. Cependant, comme ils ont été conçus en fonction des besoins du système de santé et des fournisseurs de soins, les dossiers médicaux électroniques ne sont pas plus transparents pour les patients. Pourquoi? Le partage de l'intégralité du dossier médical électronique avec le patient n'est-il pas la prochaine étape évidente de l'initiative louable qu'est la prise de décisions partagées et la collaboration patient-médecin, une idéologie bien établie dans le système de santé du Canada?

De nombreux médecins partagent *déjà* leurs notes avec leurs patients de façon ouverte et volontaire, quoiqu'informelle. Certains médecins choisissent de tourner l'écran de leur ordinateur vers le patient quand ils entrent de l'information, et de dicter les demandes de consultation en présence du patient, estimant qu'ils ne devraient pas écrire au sujet d'un patient des choses qu'ils ne veulent pas que ce dernier lise. Les technologies de l'information et Internet peuvent offrir une transparence qui s'est avérée bénéfique pour les patients et le système de santé. Il ne convient plus de nos jours qu'un médecin veuille cacher sa version de l'historique médical au patient visé. Les deux doivent s'entendre au sujet de l'historique du patient

pour une prise de décisions partagées éclairée. Les groupes de médecins et de patients doivent collaborer avec les créateurs de technologies de l'information médicale afin de trouver des solutions qui permettront d'avoir des dossiers médicaux électroniques transparents pour les patients, en toute sécurité, tout en évitant au personnel médical de devenir surchargé. Si les médecins ne prennent pas l'initiative à cet égard, ils pourraient devenir victimes de pressions ou de la législation.

## Références

1. *Loi de 2004 sur la protection des renseignements personnels sur la santé*. Disponible ici : [http://www.e-laws.gov.on.ca/html/statutes/french/elaws\\_statutes\\_04p03\\_f.htm](http://www.e-laws.gov.on.ca/html/statutes/french/elaws_statutes_04p03_f.htm) (consulté le 24 juin 2014).
2. Delbanco T, Walker J, Bell SK, et al. Inviting patients to read their doctors' notes: a quasi-experimental study and a look ahead. *Ann Intern Med* 2012;157:461–70.

**Intérêts concurrents :** Se rendre à [www.cmaj.ca/site/misc/cmaj\\_staff.xhtml](http://www.cmaj.ca/site/misc/cmaj_staff.xhtml)

**Affiliation :** Kirsten Patrick est rédactrice en chef adjointe du JAMC.

**Correspondance à :** Éditeur du JAMC, [pubs@cmaj.ca](mailto:pubs@cmaj.ca)

## RÉSUMÉS DE RECHERCHE

# Risque de convulsions fébriles après une première dose de vaccin rougeole-oreillons-rubéole-varicelle : étude de cohorte basée dans la population

Shannon E. MacDonald PhD RN, Douglas C. Dover MSc, Kimberley A. Simmonds MSc, Lawrence W. Svenson BSc

Pour la version anglaise de l'éditorial, veuillez consulter la page 824.

Voir le commentaire connexe en anglais à [www.cmaj.ca/lookup/doi/10.1503/cmaj.140778](http://www.cmaj.ca/lookup/doi/10.1503/cmaj.140778).

**Intérêts concurrents :**  
Aucun déclaré.

Cet article a été revu par les pairs.

**Correspondance à :**  
Shannon MacDonald,  
[smacdon@ualberta.ca](mailto:smacdon@ualberta.ca)

**Contexte :** Le vaccin multivalent contre la rougeole, les oreillons, la rubéole et la varicelle (RORV) actuellement utilisé au Canada (Priorix-Tetra) pourrait accroître le risque de convulsions fébriles par rapport aux vaccins distincts (ROR et varicelle) administrés auparavant. Nous avons mesuré le risque de convulsions fébriles après la première dose de vaccin RORV, de même que tout autre risque additionnel pour les enfants plus susceptibles de présenter des convulsions en raison de problèmes de santé préexistants.

**Méthodes :** Dans cette étude de cohorte rétrospective basée dans la population, nous avons comparé le risque de convulsions après la première dose de vaccin RORV et le risque associé à l'administration le même jour des vaccins ROR et varicelle (ROR+V) chez des enfants de 12 à 23 mois dans la province de l'Alberta. Nous avons relié les données sur la vaccination de manière déterministe aux données d'utilisation des services de santé pour convulsions. Nous avons utilisé la régression de Poisson avec ajustement pour tenir

compte de l'âge et de l'année de calendrier afin de déterminer le risque pour la cohorte entière et pour les enfants à haut risque.

**Résultats :** Le risque de convulsions 7 à 10 jours après la vaccination est deux fois plus élevé avec le vaccin RORV qu'avec le schéma ROR+V (risque relatif [RR] 1,99; intervalle de confiance [IC] de 95 % 1,30–3,05). Le risque absolu excédentaire de convulsions était de 3,52 convulsions par 10 000 doses de vaccin RORV par rapport au schéma ROR+V. Chez les enfants à haut risque, le risque n'a pas été différentiellement supérieur avec la préparation RORV (RR 1,30; IC de 95 % 0,60–2,79).

**Interprétation :** Malgré un risque accru de convulsions fébriles après le vaccin RORV (comparativement aux vaccins ROR+V), le taux de risque absolu a été bas. Les décideurs doivent mettre dans la balance ces résultats et les bienfaits potentiels du vaccin multivalent ou déterminer si le choix du vaccin doit être laissé aux médecins et(ou) aux parents.
